# Supplementary material for: Role of a nanoparticle network in polymer mechanical reinforcement: insights from molecular dynamics simulations
Source: Royal Society of Chemistry journal article supplement (doi:10.1039/d1cp03153h), 2021-01-01
Supplement: d1cp03153h1.pdf [file d1cp03153h1.pdf]

## Supporting information for

### **Role of nanoparticle network in polymer mechanical reinforcement: Insights from molecular dynamics simulations**

Xiu Li<sup>a</sup>, Ziwei Li<sup>c</sup>, Jianxiang Shen<sup>d</sup>, Zijian Zheng<sup>a\*</sup>, Jun Liu<sup>b\*</sup>

<sup>a</sup>Hubei Collaborative Innovation Center for Advanced Organic Chemical Materials, Key Laboratory for the Green Preparation and Application of Functional Materials, Ministry of Education, Hubei Key Laboratory of Polymer Materials, School of Materials Science and Engineering, Hubei University, Wuhan, 430062, China

<sup>b</sup>Key Laboratory of Beijing City on Preparation and Processing of Novel Polymer Materials, Beijing University of Chemical Technology, Beijing, 100029, China

<sup>c</sup>College of Material Science and Engineering, Guilin University of Technology, Guilin 541004, China.

<sup>d</sup>Department of Polymer Materials and Engineering, Jiaying University, Jiaying, 314001, China.

The e-mail address of corresponding author: [zhengzj@hubei.edu.cn](mailto:zhengzj@hubei.edu.cn); [liujun@mail.buct.edu.cn](mailto:liujun@mail.buct.edu.cn).

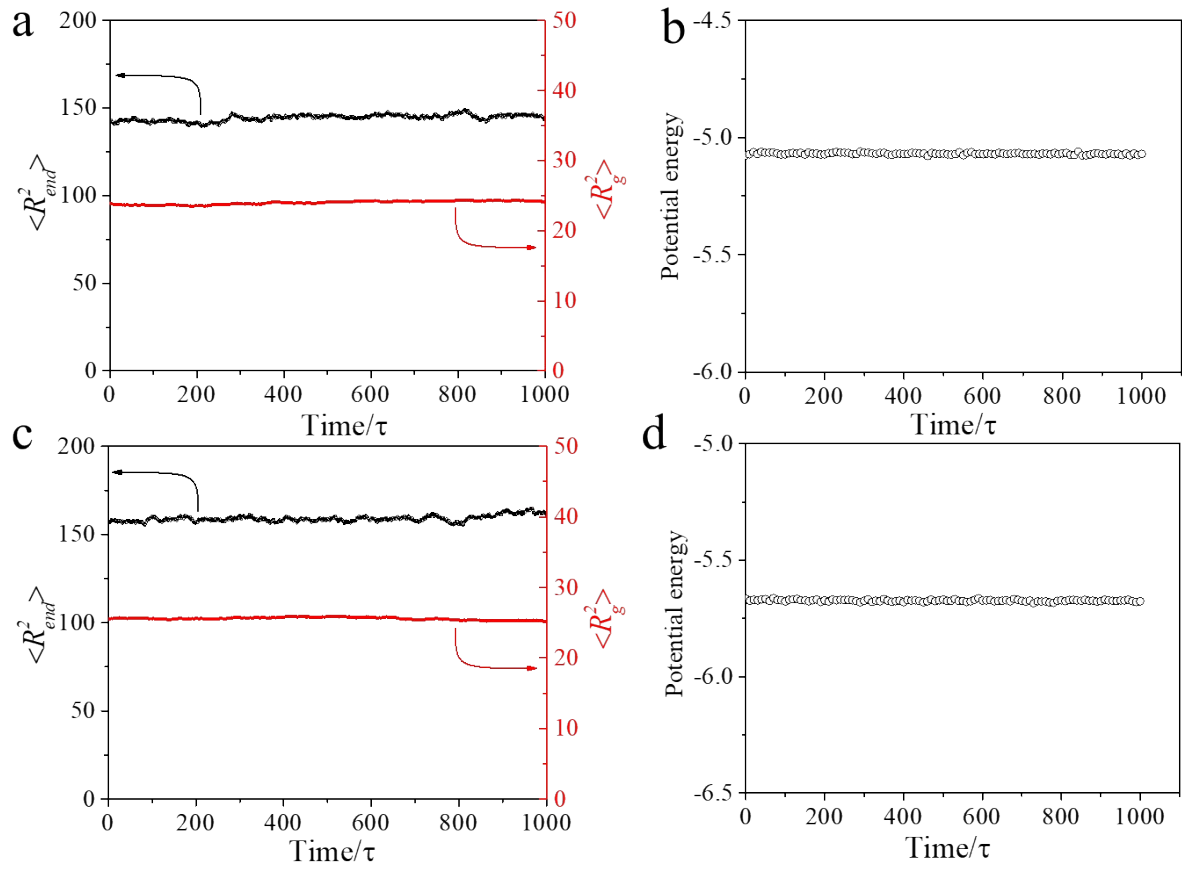

Fig. S1. (a, c) The variation of mean squared end-to-end distance  $R_{end}^2$ , radius of gyration  $R_g^2$  and (b, d) the change of the potential energy of the two systems in the following  $1.0 \times 10^6$  MD steps after enough equilibration with  $NVT$  ensemble. For a and b, the NP-polymer interaction strength  $\epsilon_{np}$  equals 2.0, NP-NP interaction strength  $\epsilon_{nn}$  equals 20.0, and  $r_{cutoff}$  equals 2.5. For c and d, the NP-polymer interaction strength  $\epsilon_{np}$  equals 2.0, NP-NP interaction strength  $\epsilon_{nn}$  equals 50.0, and  $r_{cutoff}$  equals 2.5.

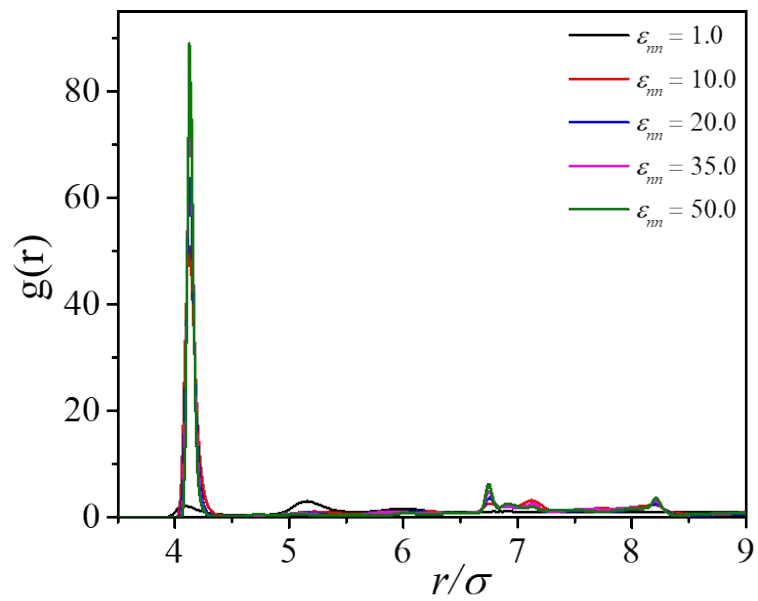

Fig. S2. Radial distribution function (RDF) of NPs for systems with different NP-NP interactions  $\epsilon_{nn}$ . Note that the NP-polymer interaction strength  $\epsilon_{np}$  equals 2.0,  $r_{cutoff}$  equals 2.5.

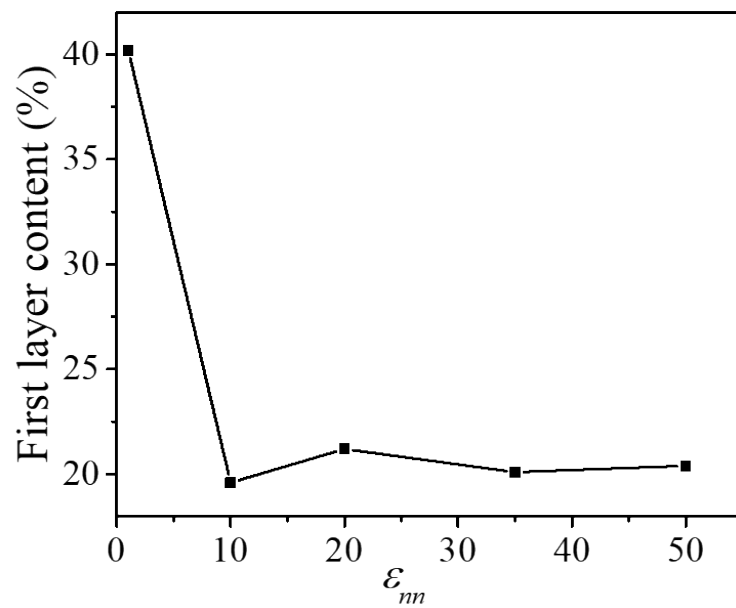

Fig. S3. Plot of the first layer content with respect to the NP-NP interactions  $\epsilon_{mn}$ . Note that the NP-polymer interaction strength  $\epsilon_{np}$  equals 2.0,  $r_{cutoff}$  equals 2.5.

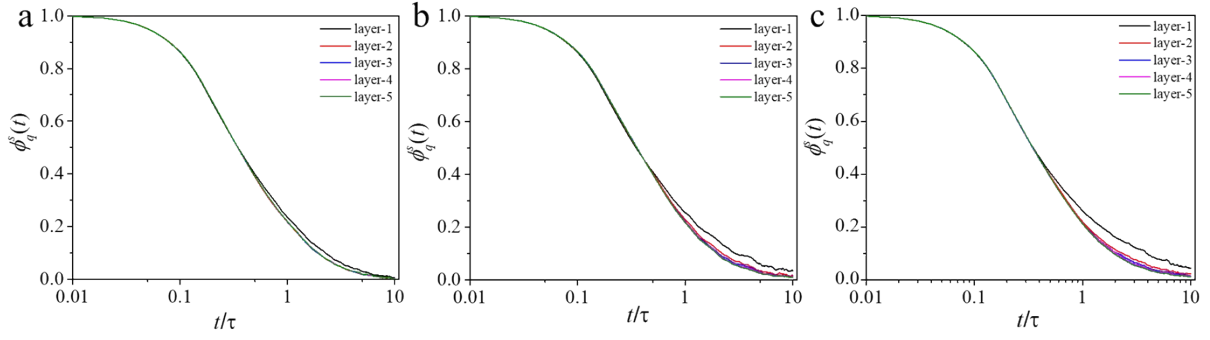

Fig. S4. Incoherent intermediate dynamic structure functions ( $\phi_q^s(t)$ ) for the different polymer layer (from layer 1 to layer 5) around NPs in PNCs with different NP-NP interactions  $\epsilon_{nn}$  at the segment length scale. (a)  $\epsilon_{nn} = 1.0$ . (b)  $\epsilon_{nn} = 20.0$ . (c)  $\epsilon_{nn} = 50.0$ . The thickness of each polymer layer is unified as  $1 \sigma$ . Note that the NP-polymer interaction strength  $\epsilon_{np}$  equals 2.0,  $r_{cutoff}$  equals 2.5.

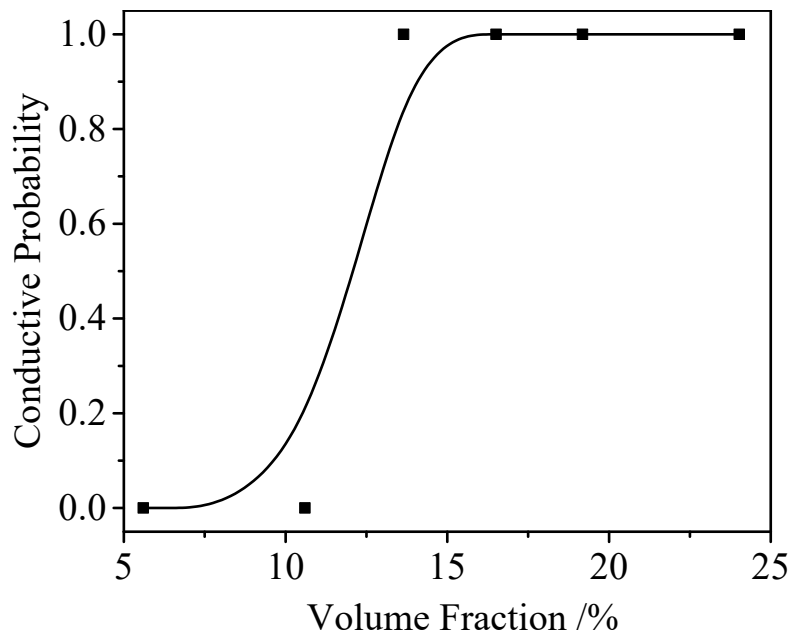

Fig. S5. The conductive probability of the nanocomposites at various volume fraction. Note that the NP-polymer interaction strength  $\epsilon_{np}$  equals to 2.0, NP-NP interaction strength  $\epsilon_{nn}$  equals 50.0, and  $r_{cutoff}$  equals 2.5.

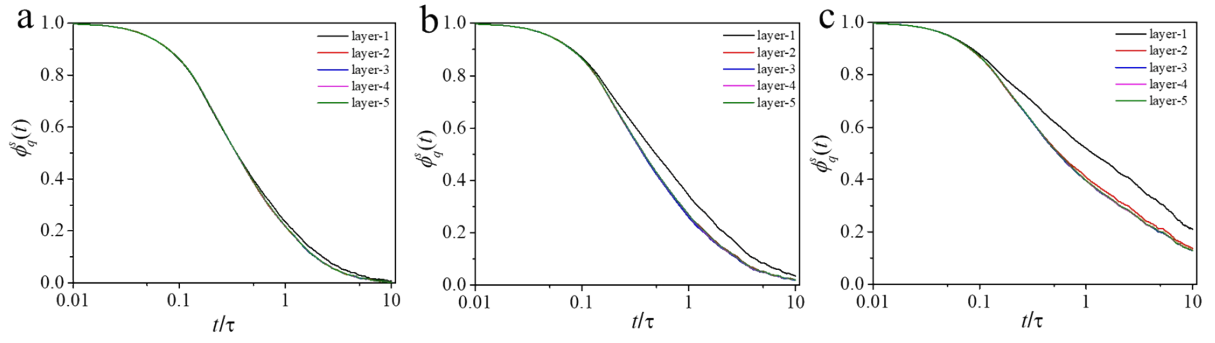

Fig. S6. Incoherent intermediate dynamic structure functions ( $\phi_q^s(t)$ ) for the different polymer layer (from layer 1 to layer 5) around NPs in PNCs with different NP-polymer interactions  $\epsilon_{np}$  at the segment length scale. (a)  $\epsilon_{np} = 2.0$ . (b)  $\epsilon_{np} = 5.0$ . (c)  $\epsilon_{np} = 8.0$ . The thickness of each polymer layer is unified as  $1 \sigma$ . Note that the NP-NP interaction strength  $\epsilon_{nn}$  equals  $1.0$ ,  $r_{cutoff}$  equals  $2.5$ .
